# Supplementary material for: Rats Orally Administered with Ethyl Alcohol for a Prolonged Time Show Histopathology of the Epididymis and Seminal Vesicle Together with Changes in the Luminal Metabolite Composition
Source: MDPI journal article supplement (doi:10.3390/biomedicines12051010), 2024-05-03
Supplement: s1 [file s1]

## **Supplementary materials of the manuscript**

**“Rats orally administered with ethyl alcohol for a prolonged time show histopathology of the epididymis and seminal vesicle together with changes of the luminal metabolite composition”**

by

Chayakorn Taoto, Nareelak Tangsrisakda, Wipawee Thukhammee,  
Sitthichai Iamsaard, Jutarop Phetcharaburanin, Nongnuj Tanphaichitr

### **Supplementary Figures**

**Supplementary Figure S1.** Hematoxylin/eosin-stained sections of the cauda epididymis from EtOH rats revealed marked disorientation and collapse of the epithelium with no discernment of the basement membrane in 10% of the total epithelium. Tissue fragments were also observed in the epididymal lumen of this highly deformed epithelium. The scale bar in the inset is 20  $\mu\text{m}$ .

**Supplementary Figure S2.** Immunoblotting of the cauda epididymis and seminal vesicle with anti-caspase 9 antibody and anti-GAPDH antibody. The blot containing electrophoresed proteins from the cauda epididymis and seminal vesicle was cut between the MW of  $\sim 60,000$  and  $30,000$ , and this blot segment was used to probe with anti-caspase 9 and then reprobed with GAPDH. This was to minimize the amount of antibodies needed for immunoblotting. The pro-caspase 9 band and cleaved-caspase 9 band as well as the GAPDH band in the first and second lanes were selected for presentation in Figure 5B. Similarly, for the presentation in Figure 6B, the pro-caspase 9 band and cleaved-caspase 9 band as well as the GAPDH band in lanes five and six were selected.

**Supplementary Figure S3.** Immunoblotting of the cauda epididymis and seminal vesicle with anti-caspase 3 antibody and anti-GAPDH antibody. The blot containing electrophoresed proteins from the cauda epididymis and seminal vesicle was cut between the MW of ~10,000 and ~35,000, and between the MW of ~35,000 and ~40,000. The first blot segment was used to probe with anti-caspase 3, whereas the second one was probed with GAPDH. This was to minimize the amount of antibodies needed for immunoblotting. The pro-caspase 3 band and cleaved-caspase 3 band as well as the GAPDH band in the first and second lanes were selected for presentation in Figure 5C. Similarly, for the presentation in Figure 6C, the pro-caspase 3 band and cleaved-caspase 3 band as well as the GAPDH band in lanes five and six were selected.

**Supplementary Figure S4.** The S-plots derived from the altered metabolic profiling of the caudal epididymal fluid (CEF) in control versus EtOH-treated groups. The selected candidate variables with  $p$  value cut-off of  $|0.05|$  and  $p(\text{corr})$  cut-off of  $|0.6|$  are colored in red. The metabolites with decreased levels after EtOH treatment included (1) carnitine, (2) myo-inositol, (3) fructose, (4) glycerophosphocholine (GPC), (5) alanine and (6) fructose 2,6-bisphosphate.

**Supplementary Figure S5.** The S-plots derived from the altered metabolic profiling of the seminal vesicle fluid (SVF) in control versus EtOH-treated groups. The selected candidate variables with  $p$  value cut-off of  $|0.05|$  and  $p(\text{corr})$  cut-off of  $|0.6|$  are colored in red. The metabolites with decreased levels after EtOH treatment included (1) lactate, (2) glycerate, (3) citrate, (4) fructose, (5) myo-inositol, (6) leucine and (7) isoleucine.

## **Supplementary Tables**

**Supplementary Table S1.** Identification of metabolites in the caudal epididymal fluid (CEF) based on their chemical shift values (ppm) from the website, <https://hmdb.ca>.

**Supplementary Table S2.** Identification of metabolites in the seminal vesicle fluid (SVF) based on their chemical shift values (ppm) from the website, <https://hmdb.ca>.

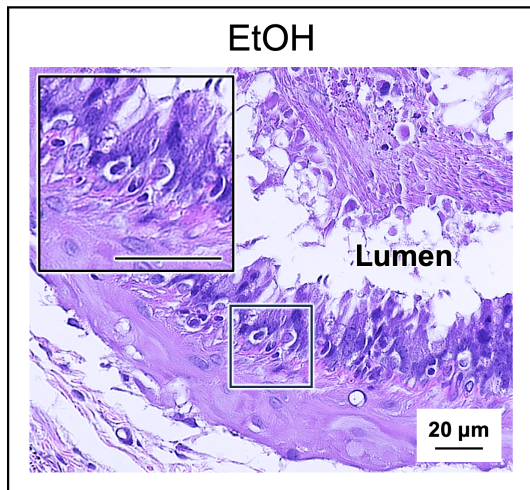

**Supplementary Figure S1.** Hematoxylin/eosin-stained sections of the cauda epididymis from EtOH rats revealed marked disorientation and collapse of the epithelium with no discernment of the basement membrane in 10% of the total epithelium. Tissue fragments were also observed in the epididymal lumen of this highly deformed epithelium. The scale bar in the inset is 20 μm.

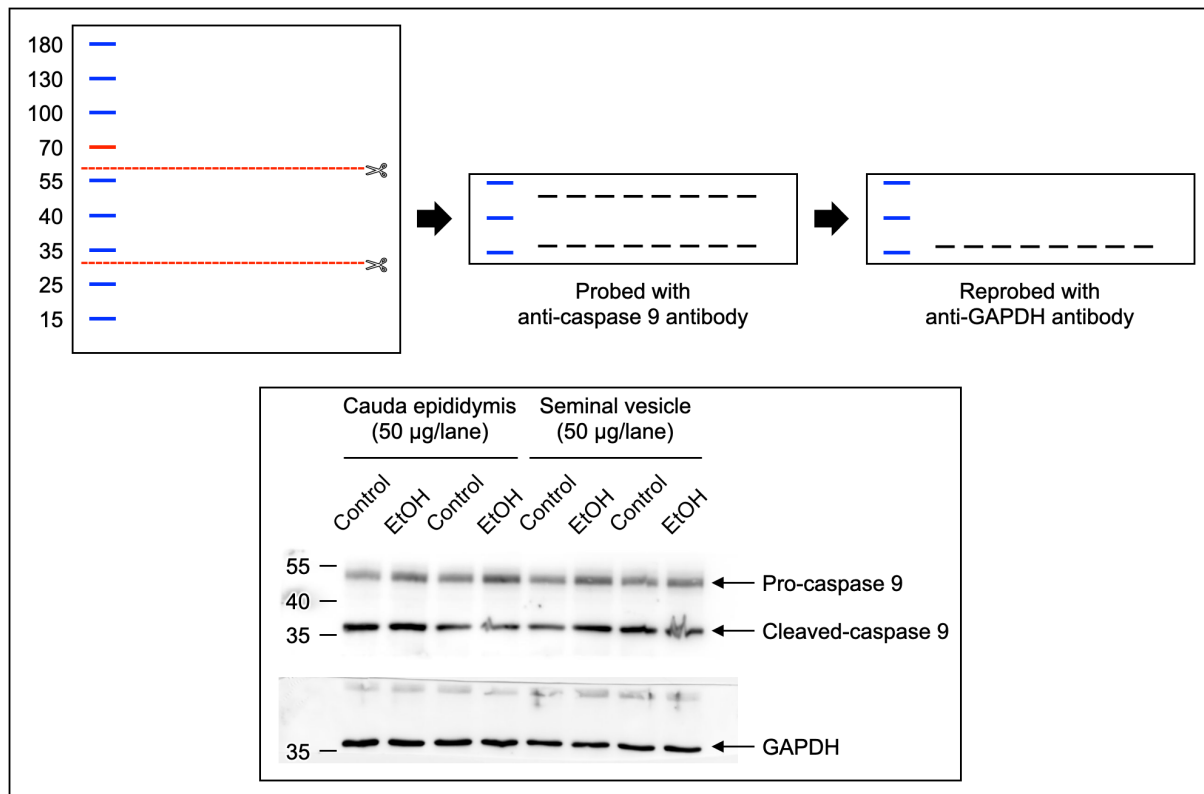

**Supplementary Figure S2.** Immunoblotting of the cauda epididymis and seminal vesicle with anti-caspase 9 antibody and anti-GAPDH antibody. The blot containing electrophoresed proteins from the cauda epididymis and seminal vesicle was cut between the MW of ~60,000 and 30,000, and this blot segment was used to probe with anti-caspase 9 and then reprobed with GADPH. This was to minimize the amount of antibodies needed for immunoblotting. The pro-caspase 9 band and cleaved-caspase 9 band as well as the GAPDH band in the first and second lanes were selected for presentation in Figure 5B. Similarly, for the presentation in Figure 6B, the pro-caspase 9 band and cleaved-caspase 9 band as well as the GAPDH band in lanes five and six were selected.

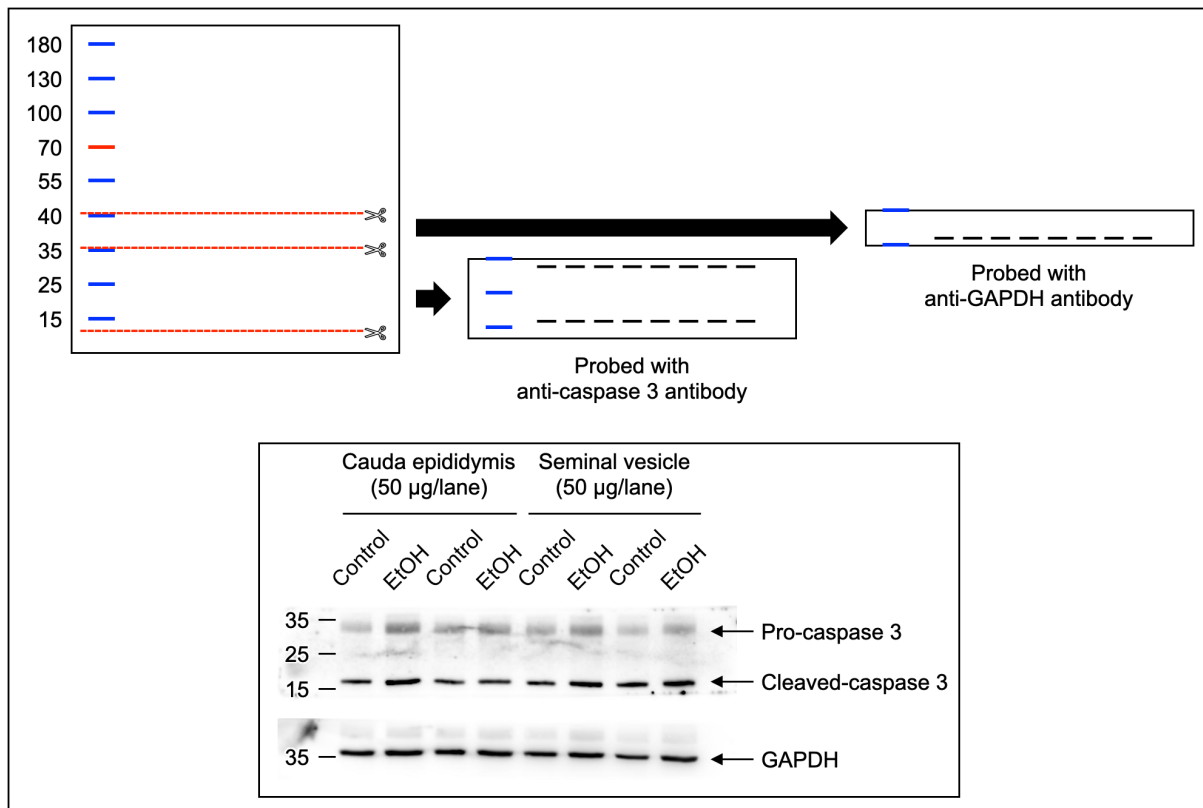

**Supplementary Figure S3.** Immunoblotting of the cauda epididymis and seminal vesicle with anti-caspase 3 antibody and anti-GAPDH antibody. The blot containing electrophoresed proteins from the cauda epididymis and seminal vesicle was cut between the MW of ~10,000 and ~35,000, and between the MW of ~35,000 and ~40,000. The first blot segment was used to probe with anti-caspase 3, whereas the second one was probed with GAPDH. This was to minimize the amount of antibodies needed for immunoblotting. The pro-caspase 3 band and cleaved-caspase 3 band as well as the GAPDH band in the first and second lanes were selected for presentation in Figure 5C. Similarly, for the presentation in Figure 6C, the pro-caspase 3 band and cleaved-caspase 3 band as well as the GAPDH band in lanes five and six were selected.

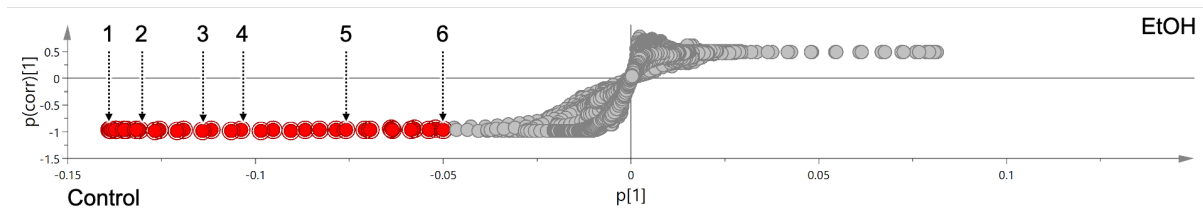

**Supplementary Figure S4.** The S-plots derived from the altered metabolic profiling of the caudal epididymal fluid (CEF) in control versus EtOH-treated groups. The selected candidate variables with  $p$  value cut-off of  $|0.05|$  and  $p(\text{corr})$  cut-off of  $|0.6|$  are colored in red. The metabolites with decreased levels after EtOH treatment included (1) carnitine, (2) myo-inositol, (3) fructose, (4) glycerophosphocholine (GPC), (5) alanine and (6) fructose 2,6-bisphosphate.

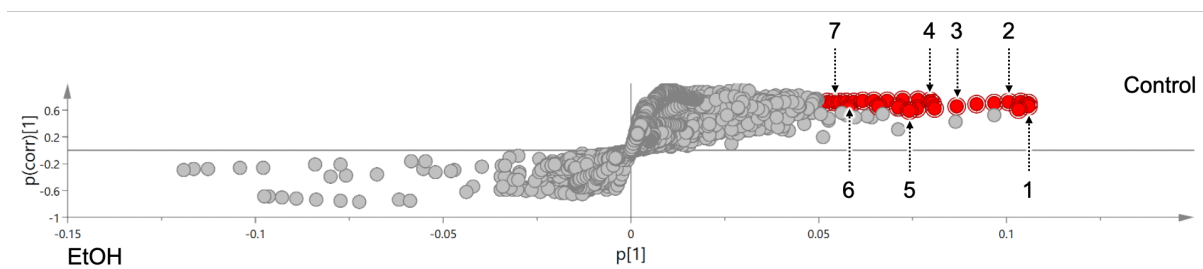

**Supplementary Figure S5.** The S-plots derived from the altered metabolic profiling of the seminal vesicle fluid (SVF) in control versus EtOH-treated groups. The selected candidate variables with  $p$  value cut-off of  $|0.05|$  and  $p(\text{corr})$  cut-off of  $|0.6|$  are colored in red. The metabolites with decreased levels after EtOH treatment included (1) lactate, (2) glycerate, (3) citrate, (4) fructose, (5) myo-inositol, (6) leucine and (7) isoleucine.

**Supplementary Table S1.** Identification of metabolites in the caudal epididymal fluid (CEF) based on their chemical shift values (ppm) from the website, <https://hmdb.ca>.

| No. | Chemical shift<br>(ppm) | Multiplicity | STOCSY                                                                                   | Metabolite            |
|-----|-------------------------|--------------|------------------------------------------------------------------------------------------|-----------------------|
| 1   | 1.32374                 | d*           | 1.32374 (d), 4.09023<br>(q)                                                              | Lactate               |
| 2   | 1.47547                 | d            | 1.47547 (d), 3.73798<br>(q)                                                              | Alanine               |
| 3   | 1.92124                 | s*           | 1.92124 (s)                                                                              | Acetate               |
| 4   | 2.07701                 | s            | 2.07701 (s), 2.52312<br>(dd), 2.62405 (dd),<br>3.20709 (s), 3.60610<br>(d), 3.86852 (dd) | Acetylcarnitine       |
| 5   | 2.14699                 | s            | 2.14699 (s), 2.63414<br>(t), 3.86852 (t)                                                 | Methionine            |
| 6   | 2.42993                 | dd*          | 2.42993 (dd),<br>3.23333 (s), 3.42779<br>(m)                                             | Carnitine             |
| 7   | 3.04156                 | s            | 3.04156 (s), 3.93412<br>(s)                                                              | Creatine              |
| 8   | 3.20709                 | s            | 3.20709 (s), 3.47960<br>(m), 4.06129 (m)                                                 | Choline               |
| 9   | 3.23333                 | s            | 3.23333 (s), 3.59634<br>(m), 3.86852 (m),<br>4.30621 (m)                                 | Glycerophosphocholine |



|    |         |    |                                                           |                           |
|----|---------|----|-----------------------------------------------------------|---------------------------|
| 10 | 3.23333 | s  | 3.23333 (s), 3.90586<br>(s)                               | Betaine                   |
| 11 | 3.26126 | s  | 3.26126 (s)                                               | Trimethylamine N-oxide    |
| 12 | 3.28413 | t* | 3.28413 (t), 3.52199<br>(dd), 3.60610 (t),<br>4.06129 (t) | Myo-inositol              |
| 13 | 3.56337 | d  | 3.56337 (d), 3.58692<br>(d), 3.65387 (m),<br>3.99367 (m)  | Fructose                  |
| 14 | 3.65387 | q* | 3.65387 (q), 3.90586<br>(m), 4.05120 (s)                  | Fructose 2,6-bisphosphate |
| 15 | 8.19706 | s  | 8.19706 (s), 8.21623<br>(s)                               | Adenine                   |
| 16 | 8.46082 | s  | 8.46082 (s)                                               | Formate                   |

s: singlet; d: doublet; t: triplet; q: quartet; dd: doublet of doublet.

**Supplementary Table S2.** Identification of metabolites in the seminal vesicle fluid (SVF) based on their chemical shift values (ppm) from the website, <https://hmdb.ca>.

| No. | Chemical shift<br>(ppm) | Multiplicity | STOCSY                                                                                   | Metabolite            |
|-----|-------------------------|--------------|------------------------------------------------------------------------------------------|-----------------------|
| 1   | 0.89176                 | m*           | 0.89176 (m),<br>1.62586 (m),<br>3.70905 (t)                                              | Leucine               |
| 2   | 0.92540                 | t*           | 0.92540 (t), 0.97318<br>(d), 1.21675 (m),<br>1.36613 (m),<br>2.18198 (m),<br>3.67271 (d) | Isoleucine            |
| 3   | 1.32374                 | d*           | 1.32374 (d), 4.08316<br>(q)                                                              | Lactate               |
| 4   | 2.09753                 | s*           | 2.09753 (s), 2.94366<br>(dd), 4.37283 (m)                                                | Acetylcysteine        |
| 5   | 2.52279                 | d            | 2.52279 (d), 2.68130<br>(d)                                                              | Citrate               |
| 6   | 3.04123                 | s            | 3.04123 (s), 3.93412<br>(s)                                                              | Creatine              |
| 7   | 3.23333                 | s            | 3.23333 (s), 3.59601<br>(m), 3.85573 (m),<br>4.30554 (m)                                 | Glycerophosphocholine |
| 8   | 3.23333                 | s            | 3.23333 (s), 3.90586<br>(s)                                                              | Betaine               |

|    |         |     |                                                                 |              |
|----|---------|-----|-----------------------------------------------------------------|--------------|
| 9  | 3.26092 | t   | 3.26092 (t), 3.52266 (dd), 3.60610 (t), 4.06096 (t)             | Myo-inositol |
| 10 | 3.59601 | d   | 3.59601 (d), 3.64008 (d), 3.80829 (d), 4.02294 (m), 4.06386 (m) | Fructose     |
| 11 | 3.70905 | dd* | 3.70905 (dd), 3.80829 (dd)                                      | Glycerate    |
| 12 | 7.83538 | s   | 7.83538 (s)                                                     | Xanthine     |

s: singlet; d: doublet; t: triplet; m: multiplet; dd: doublet of doublet.
